# Supplementary material for: Utilization Pattern of Computed Tomographic Colonography in the United States: Analysis of the U.S. National Health Interview Survey
Source: Oxford University Press journal article supplement (doi:10.1158/1940-6207.capr-20-0175), 2020-09-16
Supplement: 19406207capr200175-sup-241280_3_supp_6551128_qg5j3b.docx [file 19406207capr200175-sup-241280_3_supp_6551128_qg5j3b.docx]

| **Supplemental Table 1**. Cohort Selection | |  |  |
| --- | --- | --- | --- |
|  | **National Health Interview Survey 2015 and 2018** | | |
| **Step** | **Criteria** | **Inclusion** | **Exclusion** |
| 1 | Study participants in NHIS 2015 and 2018 | 59089 |  |
| 2 | Those aged 45+ | 35463 | 23626 |
| 3 | Those without a history of colorectal cancer | 35069 | 394 |
| 4 | Excluded if missing information on health insurance | 34960 | 109 |
| 5 | Excluded if missing information on education | 34777 | 183 |
| 6 | Excluded if missing information on employment | 34768 | 9 |
|  |  |  |  |
|  | **Final Study Cohort** |  |  |
|  | Total Sample n=34768 |  |  |
|  | Weighted N=129,430,319 |  |  |
|  |  |  |  |
|  | **Subsample: CRC Up-To-Date** |  |  |
|  | Sample n=11568 |  |  |
|  | Weighted N=43,302,853 |  |  |
|  |  |  |  |
|  | **Subsample: CT Colonography Cohort** |  |  |
|  | Sample n=372 |  |  |
|  | Weighted N=1,384,001 |  |  |
